# Supplementary material for: Toxic Effects of Bisphenol AF Exposure on the Reproduction and Liver of Female Marine Medaka (Oryzias melastigma)
Source: MDPI journal article supplement (doi:10.3390/ani14020222), 2024-01-10
Supplement: s1 [file s1]

**Table S1. Fluorescent quantitative PCR primers for marine medaka**

| Primer name    | primer sequence                                               | Genebank ID    | Product size (bp) |
|----------------|---------------------------------------------------------------|----------------|-------------------|
| <i>vtgr</i>    | F:GACAACCCGGTCTACCTGAA;<br>R:CTGGATTGAAGGAGGGATGA             | XM_024262816.2 | 164               |
| <i>vtg1</i>    | F:TTGGCAGAGATGCAGCAGCGGT;<br>R:GGAAATGCAGGACACCCCAGTAGCC      | XM_024279512.2 | 83                |
| <i>vtg2</i>    | F:AAGCCCTCAACCACTGGCTCCCTAAT;<br>R:TGGGCAGCGCCGTTCAAGATGTTGAT | XM_024279510.2 | 93                |
| <i>star</i>    | F:AGAAGGCTATCAGCATCCTCAGTG;<br>R:AGGCAGTACCTTACTCAGGACCTT     | XM_024276393.2 | 93                |
| <i>lhr</i>     | F:CCTGGTGGTGTGCTACTGCTAC;<br>R:CGGCGGAGATGGCGAAGAAG           | XM_024297983.2 | 162               |
| <i>fshr</i>    | F:GCGTGTGCGGCTGCTACC;<br>R:CGAGATGGCGAAGAAGGAGATGG            | XM_024285506.2 | 153               |
| <i>erβ</i>     | F:TGATCCAGGAGGCTGAGCTCCACGA;<br>R:ACCGCTGACGGAGGCTGTTGTGAT    | XM_024291918.2 | 121               |
| <i>cyp19a</i>  | F:ACCTCGCGTTTTTGGCAGCAAACA;<br>R:TTTCCACAGCGCCACGTTGTTGT      | XM_024296015.2 | 91                |
| <i>cyp17a1</i> | F:CAGACTACAGCGACCACGTT;<br>R:CTGGATAATGGATCAGGTAGGT           | XM_024296725.1 | 220               |
| <i>cyp11b</i>  | F:GCATTGGCCTGTTCTCCTCATCT;<br>R:CGGAGGGGTGGTTGTTAGCATT        | XM_024267121.2 | 87                |
| <i>cyp11a</i>  | F:CGTTTGGGTTTACTGCTGGACTAC;<br>R:GCGGTCAGCTTGGTTGAATATCC      | XM_024282518.2 | 187               |
| <i>era</i>     | F:TCGCCGCTGTTGTGCTGTGATGTT;<br>R:TCCTGGATCTGAGTGCGGGTCCGA     | JF907629       | 84                |
| <i>ara</i>     | F:TTTGATGAACTGCGGACCTCCTAC;<br>R:AACTGGTGCAATTTCTCACAACC      | XM_024283708.2 | 144               |
| <i>3βhsd</i>   | F:TGGTCAACCCCGTCTATGTG;<br>R:GGTGTCGTCAGTGGCGAAGT             | XM_024260561.2 | 123               |
| <i>17βhsd</i>  | F:CGCTACCTCCACAAAGTTGTTGTC;<br>R:AGTTCTGCCTCAACAGTTTCACCT     | XM_024271605.2 | 138               |
| <i>chgh</i>    | F:ATGCCGACTATCCTGTGACC;<br>R:AGCGTCCAAGAGTCAGAACC             | XM_024282618.2 | 103               |
| <i>chgl</i>    | F:CAAAGTTCGTGTCTCGACCA;<br>R:TCAGCATCAAGGGGATAAGC             | XM_024281848.1 | 140               |
| <i>fasn</i>    | F:TCTCCTTACTGAACTGTGTAGCA;<br>R:CCATTCCTGAGCAGACATACCA        | XM_024261534.2 | 148               |
| <i>dgat2</i>   | F:CACTGTGCTGCTGATCTACATT;<br>R:GAGGATCTCCTTCCACCTTGTT         | XM_024266114.2 | 115               |
| <i>apoba</i>   | F:GGCTTCTTCTCTGAATCCATCTC;                                    | XM_024266388.2 | 126               |

|               |                                                               |                |     |
|---------------|---------------------------------------------------------------|----------------|-----|
|               | R:GTCCTCTGTACCTGTCTCTTC                                       |                |     |
| <i>apoc1</i>  | F:GATGCGACCTACACTAAGATAAGA;<br>R:ATGTTGAAGTGAACCAGTTTCCT      | XM_024267688.2 | 137 |
| <i>cyp7a1</i> | F:GTCTTCAAGAGTGCCTACAGTG;<br>R:AAGGTGGATAAGGAGTCGTTCA         | XM_024268797.1 | 132 |
| <i>lpl</i>    | F:ACTGAGTGGATGACGGATTACA;<br>R:GTCTGAGCTTCTGCGTTGAATT         | XM_024278730.2 | 144 |
| <i>thf</i>    | F:CTTCGTGGTTCTGGTTCT;<br>R:GTTGTCCGCTAGTCTGAT                 | XM_024260306.2 | 171 |
| <i>il-8</i>   | F:TGCACTGCCGCTGCATCTTGACAG;<br>R:TCTGGGTTCAAGCAAACCTCCTGGC    | XM_024289379.2 | 149 |
| <i>sod</i>    | F:TGTACCAGTGCAGGGGCCTCACTTCA;<br>R:TGCGGTCACATTTCCCAGGTCCCCA  | XM_024266073.1 | 100 |
| <i>gpx</i>    | F:GTGTGCAGAAACGACGTGGCCTGGA;<br>R:TCGCCTTCGATGTCGCTGGTGAGGA   | XM_024270129.2 | 111 |
| <i>cat</i>    | F:GCCAACTACCTGCAGATCCCCGTCA;<br>R:AGTTTGGAGCGCCGCCTTGGTTGT    | XM_024265602.1 | 110 |
| <i>cox-1</i>  | F:AGTTCGACCCACGCTGCTGTTCA;<br>R:AAGCTGTCGGGCATCAAAGGGTGC      | XM_024299369.2 | 83  |
| <i>cox-2</i>  | F:CAGTGCTGACCGAGCATGGCATCA;<br>R:TTACGACCACCAGCAACCCGTCCT     | XM_024282897.2 | 129 |
| <i>ppara</i>  | F:AACAAAGATGGCCTCCTGGTGGCT;<br>R:ATGGAGTTGAAGCGTGTGGCGAAC     | XM_024293542.2 | 147 |
| <i>pparβ</i>  | F:TGCATTCCAGGGTTTGTGGACCTCT;<br>R:CTTGTGACAAAGCCTTTACCGTTGGCT | XM_024293543.2 | 147 |
| <i>rps4x</i>  | F:TGCCACCAGGCTCTCCAACAT;<br>R:TTGTCCCTCTCCTCTGCGATGG          | XM_024287485.2 | 109 |
| <i>actb2</i>  | F:GCAGGTCATCACCATCGGCAAT;<br>R:CCTCCAGACAGCACAGTGTTGG         | XM_024272788.2 | 172 |

---

**Table S2. The actual concentration of BPAF in water**

| Samples | Actual concentration at t <sub>0</sub> (SD)<br>(µg/L) | Actual concentration at t <sub>48</sub> (SD)<br>(µg/L) | Mean (SD)<br>(µg/L) |
|---------|-------------------------------------------------------|--------------------------------------------------------|---------------------|
| Control | n.d                                                   | n.d                                                    | n.d                 |
| BPAF    | 199.15 (4.94)                                         | 177.51 (8.44)                                          | 188.33 (12.84)      |

The symbol SD stands for standard deviation. The recovery efficiency of BPAF was 84%, The detection limit of BPAF is 0.5µg/L.

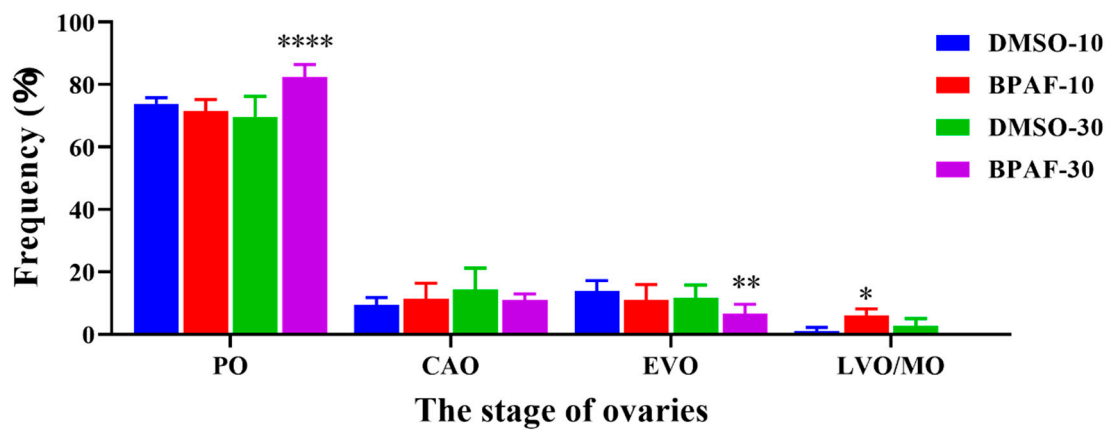

**Figure S1 The alterations in relative percentages of each stage of ovaries.**

Note: PO: perinucleolar oocytes; CAO: cortical alveolar oocytes; EVO: early vitellogenic oocytes; LVO/MO: late vitellogenic oocytes/mature oocytes; The results are represented as mean  $\pm$  S.D. (n = 8). Compared to the control (DMSO-10d), statistically significant differences are shown with asterisks (\* $P \leq 0.05$ , \*\* $P \leq 0.01$ , and \*\*\*\* $P \leq 0.0001$ ).
